# Supplementary material
Source: Research Square preprint supplement (doi:10.21203/rs.3.rs-9677975/v1)
Supplement: Supplementary file 1 [file 4e87d0e98fae16f7eb7e2880.xlsx]

## Sheet: MALDI Identification
Isolates	Organism (Best match)	Score value
MSUH241	Salmonella sp.	2.29
MSUH242	Salmonella sp.	2.18
MSUH245	Salmonella sp.	2.11
MSUH246	Salmonella sp.	2.08
MSUH247	Salmonella sp.	2.32
TPS71	Salmonella sp.	1.69
TPS72	Salmonella sp.	1.6
TPS73	Salmonella sp.	1.84
TPS74	Salmonella sp.	1.98
TPS75	Salmonella sp.	2.06
MSUH228	Staphylococcus aureus	2.36
MSUH231	Staphylococcus aureus	2.36
MSUH256	Staphylococcus aureus	2.36
MSUH257	Staphylococcus aureus	2.34
MSUH258	Staphylococcus aureus	2.31
MSUH265	Enterococcus faecium	2.17
MSUH331	Enterococcus faecalis	2.24
MSUH333	Enterococcus faecalis	2.42

## Sheet: Drug susceptibility data
Antibiotic class	Antibiotics For Salmonella	MSUH241	MSUH242	MSUH245	MSUH246	MSUH247	TPS71	TPS72	TPS73	TPS74	TPS75
Aminoglycosides	Amikacin	S	S	S	S	S	S	S	S	S	S
	Gentamicin 10 ug	S	S	S	S	S	S	S	S	S	S
	Netilmicin 30 ug	S	S	S	S	S	S	S	S	S	S
	Tobramycin	S	S	S	S	S	S	S	S	S	S
	Gentamicin 120 ug	S	S	S	S	S	S	S	S	S	S
Antipseudomonal penicillins + b-lactamase inhibitors	Piperacillin-tazobactam 30 ug	S	S	S	S	S	S	I	S	S	S
	Ticarcillin-clavulanic acid	S	I	S	S	S	R	R	R	R	R
	Piperacillin-tazobactam 100 ug	S	S	S	S	S	S	I	S	I	I
Carbapenems	Doripenem	S	S	S	S	S	I	S	S	S	S
	Ertapenem	S	S	S	S	S	R	S	R	R	R
	Imipenem	S	S	S	S	S	S	S	S	S	S
	Meropenem	S	S	S	S	S	S	S	S	S	S
Cephamycins	Cefotetan	S	S	S	S	S	S	S	S	S	S
	Cefoxitin	S	S	S	S	S	S	S	S	S	S
Extended-spectrum cephalosporins; 3rd and 4th generation cephalosporins	Cefepime	S	S	S	S	S	R	R	R	R	R
	Cefotaxime	S	S	S	S	S	R	R	R	R	R
	Ceftazidime	S	S	S	S	S	R	R	R	R	R
Fluoroquinolones	Ciprofloxacin	R	R	R	R	R	R	R	R	R	R
Folate pathway inhibitors	Trimethoprim-sulphamethoxazole	S	S	S	S	S	R	R	R	R	R
Glycylcyclines	Tigecycline	S	S	S	S	S	S	S	S	S	S
Monobactams	Aztreonam	S	S	S	S	S	R	R	R	R	R
Non-extended spectrum cephalosporins; 1st and 2nd generation cephalosporins	Cefazolin	S	S	S	S	S	R	R	R	R	R
	Cefuroxime	S	S	S	S	S	R	R	R	R	R
Penicillins	Ampicillin	S	S	S	S	S	R	R	R	R	R
Penicillins + b-lactamase inhibitors	Amoxicillin-clavulanic acid	S	S	S	S	S	S	S	S	S	S
	Ampicillin-sulbactam	S	S	S	S	S	S	S	S	S	S
Phenicols	Chloramphenicol	S	S	S	S	S	S	S	S	S	S
Phosphonic acids	Fosfomycin	S	R	S	S	S	S	S	S	S	S
Polymyxins	Colistin	S	S	S	S	S	S	S	S	S	S
Tetracyclines	Doxycycline	S	S	S	S	S	R	R	R	R	R
	Minocycline	S	S	S	S	S	S	S	S	S	S
	Tetracycline	S	S	S	S	S	R	R	R	R	R
	Resistance Category	Susceptible	Susceptible	Susceptible	Susceptible	Susceptible	MDR	MDR	MDR	MDR	MDR
Antibiotic Class	Antibiotics For S. aureus	MSUH228	MSUH231	MSUH256	MSUH257	MSUH258
Aminoglycosides	Gentamicin	S	S	S	S	S
Ansamycins	Rifampicin	S	S	S	S	S
Anti-staphylococcal b-lactams	Oxacillin	R	R	R	R	R
Fluoroquinolones	Ciprofloxacin	R	R	R	R	R
	Moxifloxacin	R	R	R	R	R
Folate pathway inhibitors	Trimethoprim/Sulfamethoxazole	S	S	S	S	S
Fucidanes	Fusidic acid	S	S	S	S	S
Glycopeptides	Teicoplanin	S	S	S	S	S
	Vancomycin	S	S	S	S	S
Glycylcyclines	Tigecycline	S	S	S	S	S
Lincosamides	Clindamycin	R	R	R	R	R
Lipopeptides	Daptomycin	S	S	S	S	S
Macrolides	Erythromicin	R	R	R	R	R
Oxazolidinones	Linezolid	S	S	S	S	S
Phenicols	Chloramphenicol	S	S	S	S	S
Phosphonic acids	Fosfomycin	S	S	S	S	S
Streptogramins	Quinupristin dalfopristin	R	R	R	R	R
Tetracyclines	Doxycycline	S	S	S	S	S
	Minocycline	S	S	S	S	S
	Tetracyclin	S	S	S	S	S
	Methicillin	I	I	R	I	I
	Resistance Category	MDR	MDR	MDR	MDR	MDR
Antibiotic Class	Antibiotics For Enterococcus	MSUH265	MSUH331	MSUH333
Aminoglycosides (except streptomycin)	Gentamicin 120ug	I	R	R
Carbapenems	Doripenem	R	16	14
	Imipenem	R	I	I
	Meropenem	0	18	16
Fluoroquinolones	Ciprofloxacin	R	R	R
	Levofloxacin	R	R	R
	Moxifloxacin	9	20	23
Glycopeptides	Teicoplanin	S	S	S
	Vancomycin	S	S	S
Glycylcyclines	Tigecycline	S	S	S
Lipopeptides	Daptomycin	S	S	S
Oxazolidinones	Linezolid	S	S	S
Penicillins	Ampicillin	R	S	S
Streptogramins	Quinupristin-dalfopristin	R	R	R
Streptomycin	Streptomycin 300 ug	S	S	S
Tetracycline	Doxycycline	R	S	S
	Minocycline	I	S	S
	Resistance Category	MDR	Susceptible	Susceptible
